# Supplementary material
Source: HighWire-hosted journal article supplement (https://bmjopen.bmj.com/content/9/7/e027951)
Supplement: inline-supplementary-material-1 [file inline-supplementary-material-1.pdf]

**Online Supplementary File** Cost-effectiveness of a combined classroom curriculum and parental intervention: economic evaluation of data from the Steps Towards Alcohol Misuse Prevention Programme (STAMPP) cluster randomised controlled trial (Agus et al).

### **Costing the intervention**

Stage 1 resources in STAMPP covered; recurring costs associated with printing/copying the intervention materials (teacher manual, pupil work book, parent/guardian information sheets, CD-ROMs) and the delivery of teacher training (trainer fees, venue, catering and teacher cover). No costs associated with the purchasing and licensing of the STAMPP intervention are foreseen and so are not included here. Stage 2 resources covered recurring costs associated with teacher time input for delivery of Phase 1 and Phase 2 of the programme. The cost of teaching time was included, even though the intervention was delivered within normal working hours and so would not have been an extra cost to the public sector. In doing so we captured the opportunity cost of the benefits to pupils which were foregone by STAMPP being delivered instead of other lessons.

Resources used during stages 1 and 2 were recorded retrospectively by the project team and costs were obtained from invoices when available. The costs associated with printing the intervention materials were not available as these resources were present at the start of the trial. We therefore obtained printing quotations and deflated it to the appropriate price year using the Consumer Price Index.<sup>1</sup> The Local Authority in Glasgow/Inverclyde covered all the costs associated with the training of the teachers including teacher cover, venue and catering and so these were also not available. We therefore used the costs that were available for NI and applied it to Scotland. The majority of teachers delivering the intervention were at a junior level, thus we used point 3 on the Main Pay Scale<sup>2</sup> including 24% for employers' costs.

Stage 1 costs were added together to get a total cost. Stage 2 costs relating to the delivery of the intervention at a class level were multiplied by the total number of classes that received intervention to get a total cost. This was estimated by dividing the number of pupils receiving the intervention at baseline (n=5749) by 30, which was used as an estimate of the maximum number of pupils per class. Stage 2 costs relating to the delivery of the parental component were calculated by multiplying the number of schools by the costs to deliver one session. Stage

1 and Stage 2 costs were totalled and divided by the number of pupils receiving the intervention at baseline to obtain the mean cost per pupil.

1. Office for National Statistics. (2015). CPI annual percentage change: 1989 to 2015. Retrieved from <http://www.ons.gov.uk/ons/datasets-and-tables/data-selector.html?cdid=D7G7&dataset=mm23&table-id=1.2> (accessed Dec 9 2015)
2. Department of Education Northern Ireland. Circular 2014/13 - Teachers' pay and allowances from 1 September 2013. 2014. Available from <https://www.deni.gov.uk/publications/circular-201413-teachers-pay-and-allowances-1-september-2013> (accessed Dec 9 2015)

Table S1 Breakdown of missing cost and/outcome data by group

| Missing data | Intervention<br>n=2190 [%] | Education as normal<br>n=2322 [%] | Total<br>n=4512 [%] |
|--------------|----------------------------|-----------------------------------|---------------------|
| Outcome      | 1219 [57]                  | 1286 [55]                         | 2505 [56]           |
| Cost         | 2123 [97]                  | 2256 [97]                         | 4379 [97]           |
| Both         | 1152 [53]                  | 1220 [53]                         | 2372 [53]           |

Table S2 Intervention resource use and costs

| Resource use                                         | Unit<br>cost (£) | Number<br>of units | Total<br>cost (£) | Cost details        |
|------------------------------------------------------|------------------|--------------------|-------------------|---------------------|
| <b>Stage 1 Planning and preparation for delivery</b> |                  |                    |                   |                     |
| <b>Intervention materials</b>                        |                  |                    |                   |                     |
| Phase 1 Teacher Manual                               | n/a              | 145                | 240               | 16 pages            |
| Phase 2 Teacher Manual                               | n/a              | 145                | 293               | 22 pages            |
| Phase 1 Pupil Workbook                               | n/a              | 5749               | 2623              | 20 pages            |
| Phase 2 Pupil Workbook                               | n/a              | 5749               | 2623              | 20 pages            |
| Parent & Guardian Information Sheet                  | n/a              | 5749               | 255               | single-sided page   |
| Parent & Guardian Information Sheet (follow up)      | n/a              | 5749               | 255               | single-sided page   |
| Phase 1 CD-ROM                                       | 1.40             | 145                | 203               | cost of duplication |
| Phase 2 CD-ROM                                       | 1.40             | 145                | 203               | cost of duplication |
| <b>Training of the teachers (Phase 1)</b>            |                  |                    |                   |                     |

|                                             |        |     |       |                                                                                |
|---------------------------------------------|--------|-----|-------|--------------------------------------------------------------------------------|
| <b><i>Northern Ireland</i></b>              |        |     |       |                                                                                |
| Training                                    | 500.00 | 3   | 1500  | Training delivered by a non-government organisation facilitator (£500 per day) |
| Teachers                                    | 161.79 | 107 | 17312 | Based on 1 day (6.5 hours) teaching cover for a junior teacher at £24.89/hour  |
| Location & associated cost (e.g. room hire) | 25.00  | 107 | 2675  | Based on local hotel costs including food & refreshments per head              |
| <b><i>Scotland</i></b>                      |        |     |       |                                                                                |
| Training                                    | 500.00 | 2   | 1000  | Training delivered by a non-government organisation facilitator (£500 per day) |
| Teachers                                    | 161.79 | 38  | 6148  | Based on 1 day (6.5 hours) teaching cover for a junior teacher at £24.89/hour  |
| Location & associated cost (e.g. room hire) | 25.00  | 38  | 950   | Local hotel costs including food & refreshments (£25/head)                     |
| <b>Training of the teachers (Phase 2)</b>   |        |     |       |                                                                                |
| <b><i>Northern Ireland</i></b>              |        |     |       |                                                                                |
| Training sessions                           | 500.00 | 3   | 1500  | Training delivered by a non-government organisation facilitator (£500 per day) |
| Teachers                                    | 24.89  | 83  | 2066  | based on 1 day (6.5 hours) teaching cover for a junior teacher                 |
| Location & associated cost (e.g. room hire) | 28.78  | 83  | 2389  | Local hotel costs including food & refreshments (£28.78/head)                  |
| <b><i>Scotland</i></b>                      |        |     |       |                                                                                |
| Trainer                                     | 500.00 | 1   | 500   | Training delivered by a non-government organisation facilitator (£500 per day) |
| Teachers                                    | 24.89  | 38  | 946   | based on 1 day (6.5 hours) teaching cover for a junior teacher                 |
| Location & associated cost (e.g. room hire) | 28.78  | 38  | 1094  | Local hotel costs including food & refreshments (£28.78/head)                  |
| <b>Stage 2 Delivery</b>                     |        |     |       |                                                                                |
| Phase 1 Teacher time input                  | 14.52  | 6   | 87    | Based on 35 minute lessons                                                     |
| Phase 2 Teacher time input                  | 14.52  | 4   | 58    | Based on 35 minute lessons                                                     |

|                             |        |    |       |                                                                       |
|-----------------------------|--------|----|-------|-----------------------------------------------------------------------|
| Parental component delivery | 250.00 | 53 | 13250 | Delivered by a non-government organisation facilitator (£500 per day) |
|-----------------------------|--------|----|-------|-----------------------------------------------------------------------|

**Use of public sector services by all pupils with available data at each of the time points.**

Table S3 Public sector service by treatment arm from 6 to 12 months. Values are number (percentages) of pupils using the service and mean (SD) use.

| Service                                                | Intervention (n=4189)        |           | Education as normal (n=4037) |           |
|--------------------------------------------------------|------------------------------|-----------|------------------------------|-----------|
|                                                        | Number using the service (%) | Mean (SD) | Number using the service (%) | Mean (SD) |
| <b>Education</b>                                       |                              |           |                              |           |
| School nurse                                           | 1792 (42.8)                  | 0.9 (3.0) | 1518 (37.6)                  | 0.9 (3.4) |
| School counsellor/guidance teacher                     | 642 (15.3)                   | 0.5 (3.5) | 646 (16.0)                   | 0.4 (1.8) |
| Educational psychologist                               | 71 (1.7)                     | 0.0 (0.8) | 84 (2.1)                     | 0.0 (0.4) |
| Education welfare officer/ home-school liaison officer | 59 (1.4)                     | 0.0 (0.4) | 89 (2.2)                     | 0.0 (0.9) |
| <b>Health</b>                                          |                              |           |                              |           |
| GP surgery visit                                       | 2033 (48.5)                  | 1.1 (5.0) | 1791 (44.4)                  | 0.9 (1.8) |
| GP out of hours                                        | 521 (12.4)                   | 0.2 (0.9) | 423 (10.5)                   | 0.2 (0.8) |
| Nurse (other than school nurse)                        | 839 (20.0)                   | 0.3 (0.9) | 705 (17.5)                   | 0.3 (0.8) |
| Hospital appointment                                   | 1338 (31.9)                  | 0.6 (1.5) | 1200 (29.7)                  | 0.6 (2.1) |
| Accident & Emergency                                   | 827 (19.7)                   | 0.3 (0.7) | 737 (18.3)                   | 0.3 (1.1) |
| Overnight hospital stay                                | 270 (6.5)                    | 0.2 (2.0) | 261 (6.5)                    | 0.3 (3.7) |
| Psychologist                                           | 72 (1.7)                     | 0.0 (0.8) | 81 (2.0)                     | 0.0 (0.5) |
| Counsellor (other than at school)                      | 76 (1.8)                     | 0.1 (0.9) | 65 (1.6)                     | 0.1 (1.4) |
| Social worker                                          | 142 (3.4)                    | 0.1 (1.7) | 112 (2.8)                    | 0.1 (1.6) |
| Telephone help-line                                    | 30 (0.7)                     | 0.0 (0.4) | 46 (1.1)                     | 0.0 (0.4) |
| <b>Criminal Justice</b>                                |                              |           |                              |           |
| Youth justice service                                  | 32 (0.8)                     | 0.0 (0.6) | 33 (0.8)                     | 0.0 (0.3) |
| Police service                                         | 108 (2.6)                    | 0.0 (0.4) | 120 (3.0)                    | 0.0 (0.4) |

Table S4 Public sector service by treatment arm from 18 to 24 months. Values are number (percentages) of pupils using the service and mean (SD) use.

| Service                                                | Intervention (n=4189)        |           | Education as normal (n=4037) |           |
|--------------------------------------------------------|------------------------------|-----------|------------------------------|-----------|
|                                                        | Number using the service (%) | Mean (SD) | Number using the service (%) | Mean (SD) |
| <b>Education</b>                                       |                              |           |                              |           |
| School nurse                                           | 1403 (33.5)                  | 0.7 (2.2) | 1325 (32.8)                  | 0.7 (3.4) |
| School counsellor/guidance teacher                     | 567 (13.5)                   | 0.4 (3.0) | 608 (15.1)                   | 0.5 (3.3) |
| Educational psychologist                               | 62 (1.5)                     | 0.1 (1.9) | 42 (1.0)                     | 0.0 (0.5) |
| Education welfare officer/ home-school liaison officer | 84 (2.0)                     | 0.1 (1.3) | 55 (1.4)                     | 0.0 (0.5) |
| <b>Health</b>                                          |                              |           |                              |           |
| GP surgery visit                                       | 2013 (48.1)                  | 0.9 (2.2) | 1978 (49.0)                  | 0.9 (1.4) |
| GP out of hours                                        | 498 (11.9)                   | 0.2 (1.8) | 462 (11.4)                   | 0.2 (0.6) |
| Nurse (other than school nurse)                        | 768 (18.3)                   | 0.3 (2.2) | 752 (18.6)                   | 0.3 (1.0) |
| Hospital appointment                                   | 1269 (30.3)                  | 0.6 (2.7) | 1269 (31.4)                  | 0.6 (0.8) |
| Accident & Emergency                                   | 764 (18.2)                   | 0.3 (2.3) | 810 (20.1)                   | 0.3 (0.8) |
| Overnight hospital stay                                | 245 (5.9)                    | 0.3 (3.3) | 266 (6.6)                    | 0.3 (7.3) |
| Psychologist                                           | 86 (2.1)                     | 0.1 (2.6) | 91 (2.3)                     | 0.1 (1.0) |
| Counsellor (other than at school)                      | 111 (2.7)                    | 0.1 (2.8) | 104 (2.6)                    | 0.1 (1.1) |
| Social worker                                          | 137 (3.3)                    | 0.6 (3.3) | 132 (3.3)                    | 0.1 (1.2) |
| Telephone help-line                                    | 42 (1.0)                     | 0.1 (3.0) | 48 (1.2)                     | 0.1 (0.9) |
| <b>Criminal Justice</b>                                |                              |           |                              |           |
| Youth justice service                                  | 31 (0.7)                     | 0.1 (3.2) | 30 (0.7)                     | 0.0 (1.0) |
| Police service                                         | 144 (3.4)                    | 0.1 (3.3) | 129 (3.2)                    | 0.1 (1.6) |

Table S5 Public sector service by treatment arm from 27 to 33 months. Values are number (percentages) of pupils using the service and mean (SD) use.

| Service                                                | Intervention (n=4189)        |           | Education as normal (n=4037) |           |
|--------------------------------------------------------|------------------------------|-----------|------------------------------|-----------|
|                                                        | Number using the service (%) | Mean (SD) | Number using the service (%) | Mean (SD) |
| <b>Education</b>                                       |                              |           |                              |           |
| School nurse                                           | 1195 (28.5)                  | 0.6 (2.2) | 1094 (27.1)                  | 0.5 (1.4) |
| School counsellor/guidance teacher                     | 558 (13.3)                   | 0.6 (3.7) | 560 (13.9)                   | 0.6 (3.8) |
| Educational psychologist                               | 41 (0.98)                    | 0.0 (0.4) | 39 (1.0)                     | 0.0 (0.4) |
| Education welfare officer/ home-school liaison officer | 64 (1.5)                     | 0.1 (4.5) | 56 (1.4)                     | 0.0 (0.5) |
| <b>Health Sector</b>                                   |                              |           |                              |           |
| GP surgery visit                                       | 1943 (46.4)                  | 1.0 (1.8) | 1790 (44.3)                  | 1.0 (2.2) |
| GP out of hours                                        | 399 (9.5)                    | 0.1 (0.6) | 350 (8.7)                    | 0.1 (0.7) |
| Nurse (other than school nurse)                        | 622 (14.9)                   | 0.3 (0.9) | 593 (14.7)                   | 0.3 (1.0) |
| Hospital appointment                                   | 1073 (25.6)                  | 0.6 (1.7) | 975 (24.2)                   | 0.5 (2.0) |
| Accident & Emergency                                   | 635 (15.2)                   | 0.2 (0.6) | 626 (15.5)                   | 0.2 (1.0) |
| Overnight hospital stay                                | 169 (4.0)                    | 0.1 (1.0) | 161 (4.0)                    | 0.1 (1.0) |
| Psychologist                                           | 85 (2.0)                     | 0.1 (1.5) | 73 (1.8)                     | 0.1 (0.8) |
| Counsellor (other than at school)                      | 96 (2.29)                    | 0.2 (1.6) | 98 (2.4)                     | 0.1 (1.6) |
| Social worker                                          | 85 (2.03)                    | 0.1 (1.3) | 108 (2.7)                    | 0.1 (1.1) |
| Telephone help-line                                    | 43 (1.0)                     | 0.0 (0.6) | 39 (1.0)                     | 0.0 (0.4) |
| <b>Criminal Justice Service</b>                        |                              |           |                              |           |
| Youth justice service                                  | 10 (0.2)                     | 0.0 (0.3) | 18 (0.5)                     | 0.0 (0.3) |
| Police service                                         | 97 (2.3)                     | 0.1 (0.5) | 111 (2.8)                    | 0.0 (0.6) |

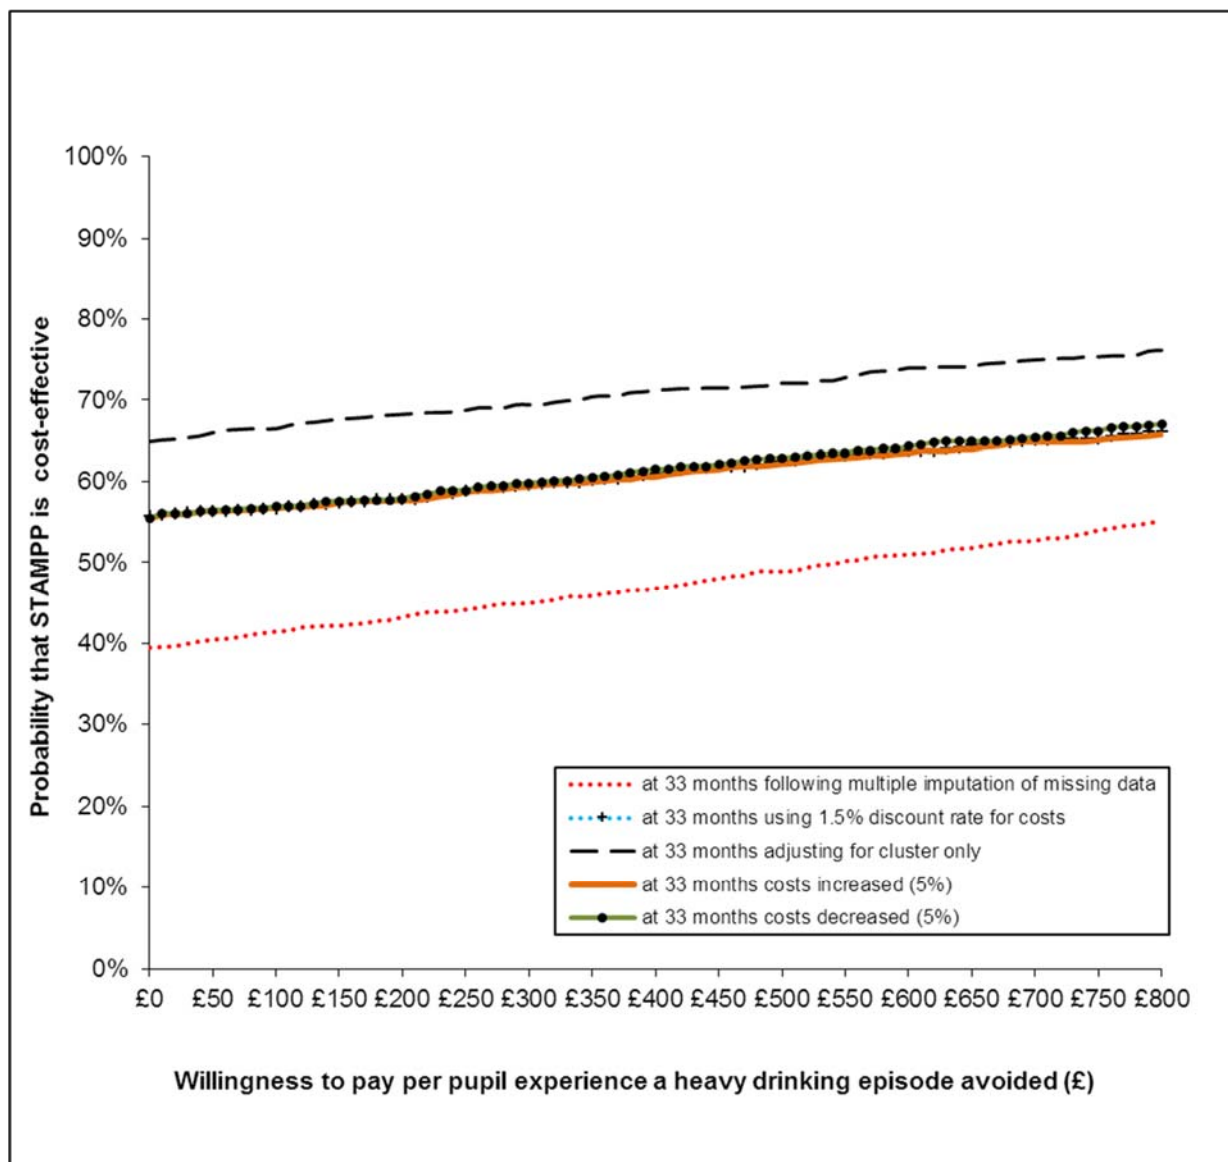

Figure S1 Cost effectiveness acceptability curves showing the probability of STAMPP being cost-effective compared to usual education for the sensitivity analyses.



Table S6 Baseline characteristics of pupils' with complete and non-complete health economic data by intervention arm. Values are counts [percentage] or mean [95% Confidence interval]

| Baseline characteristics                      | Complete data<br>(included in cost-effectiveness analysis) |                                     |                        | Incomplete data<br>(excluded from cost-effectiveness analysis) |                                     |                        |
|-----------------------------------------------|------------------------------------------------------------|-------------------------------------|------------------------|----------------------------------------------------------------|-------------------------------------|------------------------|
|                                               | Intervention<br>n=4189 [%]                                 | Education<br>as normal<br>n=4037[%] | Total<br>n=8226<br>[%] | Intervention<br>n=2190 [%]                                     | Education<br>as normal<br>n=2322[%] | Total<br>n=4512<br>[%] |
| <i>School location</i>                        |                                                            |                                     |                        |                                                                |                                     |                        |
| NI                                            | 2764 [66]                                                  | 2637 [65]                           | 5401 [66]              | 1085 [50]                                                      | 1256 [54]                           | 2341 [52]              |
| Scotland                                      | 1425 [34]                                                  | 1400 [35]                           | 2825 [34]              | 1105 [50]                                                      | 1066 [46]                           | 2171 [48]              |
| <i>School free school meal category*</i>      |                                                            |                                     |                        |                                                                |                                     |                        |
| Low                                           | 1720 [41]                                                  | 1442 [36]                           | 3162 [38]              | 617 [28]                                                       | 509 [22]                            | 1126 [25]              |
| Moderate                                      | 1672 [40]                                                  | 1469 [36]                           | 3141 [38]              | 880 [40]                                                       | 991 [43]                            | 1871 [41]              |
| High                                          | 797 [19]                                                   | 1126 [28]                           | 1923 [23]              | 693 [32]                                                       | 822 [35]                            | 1515 [34]              |
| <i>School type</i>                            |                                                            |                                     |                        |                                                                |                                     |                        |
| Co-education                                  | 3353 [80]                                                  | 3229 [80]                           | 6582 [80]              | 1910 [87]                                                      | 1989 [86]                           | 3899 [86]              |
| Girls                                         | 541 [13]                                                   | 394 [10]                            | 935 [11]               | 175 [8]                                                        | 114 [5]                             | 289 [6]                |
| Boys                                          | 295 [7]                                                    | 414 [10]                            | 709 [9]                | 105 [5]                                                        | 219 [9]                             | 324 [7]                |
| <i>Pupil reported heavy episodic drinking</i> |                                                            |                                     |                        |                                                                |                                     |                        |
| Yes                                           | 198 [5]                                                    | 213 [5]                             | 411 [5]                | 233 [11]                                                       | 219 [9]                             | 452 [10]               |
| No                                            | 3588 [86]                                                  | 3319 [82]                           | 6907 [84]              | 1673 [76]                                                      | 1763 [76]                           | 3436 [76]              |
| Missing                                       | 403 [10]                                                   | 505 [13]                            | 908 [11]               | 284 [13]                                                       | 340 [15]                            | 624 [14]               |

\* Percentage of n (n=Free school meal provision- Low; 0-15.4%, Moderate; 15.5-30.4%, High; 30.5% and above

Table S7 Public service costs (£UK) in the 6 months pre-baseline (reported at baseline).

| Baseline characteristic | Complete data<br>(included in cost-effectiveness analysis) |                                  |                 | Incomplete data<br>(excluded from cost-effectiveness analysis) |                                  |                 |
|-------------------------|------------------------------------------------------------|----------------------------------|-----------------|----------------------------------------------------------------|----------------------------------|-----------------|
|                         | Intervention<br>n=4189                                     | Education<br>as normal<br>n=4037 | Total<br>n=8226 | Intervention<br>n=2190                                         | Education<br>as normal<br>n=2322 | Total<br>n=4512 |
| Mean [95% CI]           | 620 [481-759]                                              | 631 [487-774]                    | 625 [525-725]   | 667 [572-761]                                                  | 698 [612-783]                    | 682 [619, 746]  |

|                   |         |          |          |          |         |          |
|-------------------|---------|----------|----------|----------|---------|----------|
| Missing (n;<br>%) | 371 [9] | 484 [12] | 855 [10] | 259 [12] | 308 13] | 567 [13] |
|-------------------|---------|----------|----------|----------|---------|----------|

### Alternative intervention costs

We explored two alternative scenarios for delivering STAMPP- 1) the removal of the parental component making the intervention classroom based only, 2) the removal of the parental component and the the costs associated with teaching time (to reflect STAMPP being incorporated in to the curriculum).

Table S8 Total cost to deliver STAMPP

| <b>Stage 1 Planning and preparation for delivery</b>               | <b>Total Cost (£)</b> |
|--------------------------------------------------------------------|-----------------------|
| Materials                                                          | £6,694                |
| Training                                                           | £38,079               |
| <b>Stage 1 subtotal</b>                                            | <b>£44,773</b>        |
| <b>Stage 2 Delivery</b>                                            |                       |
| Teaching                                                           | £27,877               |
| Facilitator (for parental component)                               | £13,250               |
| <b>Stage 2 subtotal</b>                                            | <b>£41,127</b>        |
| <b>STAMPP Total Cost</b>                                           | <b>£85,900</b>        |
| Mean cost/school <sup>1</sup>                                      | <b>£818</b>           |
| Mean cost/pupil <sup>2</sup>                                       | <b>£15</b>            |
|                                                                    |                       |
| <b>Classroom component only- Total Cost<sup>3</sup></b>            | <b>£72,650</b>        |
| Mean cost/school <sup>1</sup>                                      | <b>£692</b>           |
| Mean cost/pupil <sup>2</sup>                                       | <b>£13</b>            |
| <b>Materials and teacher training only- Total Cost<sup>4</sup></b> | <b>£44,773</b>        |
| Mean cost/school <sup>1</sup>                                      | <b>£426</b>           |
| Mean cost/pupil <sup>2</sup>                                       | <b>£8</b>             |

<sup>1</sup>based on 5749 pupils at baseline and 192 classes

<sup>2</sup>based on 105 schools

<sup>3</sup>excluding parental component cost of £13,250 for facilitator

<sup>4</sup>based on Stage 1 costs only
